# Supplementary material for: Insights on Calcium-Dependent Protein Kinases (CPKs) Signaling for Abiotic Stress Tolerance in Plants
Source: Int J Mol Sci. 2019 Oct 24;20(21):5298. doi: 10.3390/ijms20215298 (PMC6862689; doi:10.3390/ijms20215298)
Supplement: Supplementary file 1 [file ijms-20-05298-s001.xlsx]

## Sheet: Genes names and Accsession No.
Accession Numbers of Genes used in the Review
Sr. No.	Accession No / Gene ID	Gene Name	Name of species
1	AT4G26080.1	AtABI1	Arabidopsis thaliana
2	AT2G39660.1	AtBIK1
3	LOC106758827	AtCNGC18
4	AT1G18890.1	AtCPK1
5	NC_003070	AtCPK10
6	NC_003070	AtCPK11
7	NM_122264	AtCPK12
8	AT2G17890.1	AtCPK16
9	AT4G04720.1	AtCPK21
10	AT4G04740.2	AtCPK23
11	AT4G04700.1	AtCPK27
12	AT5G66210.2	AtCPK28
13	AT2G46700.1	AtCPK3
14	AT3G57530.1	AtCPK32
15	AT1G50700.1	AtCPK33
16	AT4G09570.1	AtCPK4
17	AT4G35310.1	AtCPK5
18	AT4G23650.1	AtCPK6
19	Not Found	AtCPK8
20	AT5G23580.1	AtCPK9
21	AY091168	AtCSD1
22	At1g73410	AtHSP101
23	AT1G79920.1	AtHSP70
24	AT3G55610.1	AtP5CS2
25	At2g39890	AtProT1
26	AT5G66400	AtRAB18
27	AT5G47910.1	AtRBOHD
28	AT1G64060.1	AtRBOHF
29	BnaC02g08720D	BnaCPK2	Brassica napus
30	NM_001279146.1	CaCPK1	Cicer areitinum
31	NM_001279194.3	CaCPK2
32	CA01g10500	CaCPK3
33	KU641682.1	CsCDPK20	Camellia sinensis
34	KU201349.1	CsCDPK26
35	AF035944	FaCPK1	Fragaria x ananassa
36	EU581818.2	HbCDPK1	Hevea brasiliensis
37	XM_008441760.2	HmCDPK2	Cucumis melo
38	JX122906.1	HvCPK3	Hordeum vulgare
39		HvCPK4
40	GSMUA_Achr8G19290_001	MaCDPK2	Musa acuminate
41	GSMUA_Achr2G06360_001	MaCDPK3
42	GSMUA_Achr2G06360_001	MaCDPK4
43	GSMUA_Achr1G08900_001	MaCDPK7
44	DQ093069	MsCPK3	Medicago sativa
45		NaCDPK4	Nicotiana attenuate
46		NaCDPK5
47	AF072908.1	NtCPK1	Nicotiana tabacum
48	AJ344154.1	NtCPK2
49	NM_001325818.1	NtCPK32
50	LOC_Os01g43410	OsCPK1	Oryza sativa
51	LOC_Os03g57450	OsCPK10
52	LOC_Os04g47300	OsCPK12
53	LOC_Os04g49510	OsCPK13
54	LOC_Os07g06740	OsCPK17
55	LOC_Os08g42750	OsCPK21
56	LOC_Os11g07040	OsCPK24
57	AK110341/ not found	OsCPK31
58	LOC_Os02g03410	OsCPK4
59	LOC_Os02g46090	OsCPK5
60	LOC_Os03g48270	OsCPK9
61	Os08g20660	OsSPS4
62	NM_001324640.1	PaCPK1	Phalaenopsis amabilis
63	NM_001304303.1	PeCPK10	Populus euphratica
64	DQ421785.1	PgCDPK1a	Panax ginseng
65	XM_019296116.1	PnCPK1	Pharbitis nil
66	Not Found	SlCDPK10	Solanum lycopersicum
67	XM_004232444.4	SlCDPK18
68	XM_004231562.4	SlCDPK2
69	NM_001287861.1	StCDPK5	Solanum tuberosum
70	XM_015310592.1	StCDPK7
71	NM_001288393.1	StCPK1
72	NM_001287877.1	StCPK4
73	DQ431851.1	TaCDPK1	Triticum aestivum
74	EU181185.1	TaCDPK12
75	EU181192.1	TaCDPK7
76	JQ793892.1	VaCPK1	Vitis amurensis
77		VaCPK20
78		VaCPK21
79		VaCPK26
80	AY753552.1	VfCPK1	Vicia faba
81	XM_014658326.2	VrCPK1
82	NM_001374293.1	ZmCPK1	Zea mays
83	XM_008646218.3	ZmCPK11
84	XM_008680734.3	ZmCPK4
85	XM_012715175.1	ZmRAB18
86	KC544003.1	ZoCDPK1	Zingiber officinale
